# Supplementary material for: Fluorescent Sensors Based on Organic Polymer-Capped Gold Nanoparticles for the Detection of Cr(VI) in Water
Source: Hindawi journal article supplement (doi:10.1155/2019/1756014), 2019-02-03
Supplement: f1 [file 1756014.f1.pdf]

## **Supplementary Materials**

### **Fluorescent sensors based on organic polymer capped gold nanoparticles for the detection of Cr(VI) in water**

**Na Wang\*, Liangchen Wang, Hong Yang, Tingting Xiong, Shangping Xiao, Jiawen Zhao and Weiping Du**

School of Chemistry & Chemical Engineering, Southwest Petroleum University,  
Chengdu 610500, Sichuan, PR China

\*Corresponding author. Tel: +86 028 8303 7341

Fax: +86 028 8303 7305

E-mail address: wangna@swpu.edu.cn

Table S1. Comparison of the present approach with other reported methods for the detection of Cr (VI) in aqueous solution.

| Method          | Probe                                    | LOD                                     | Linearity                                 | Ref       |
|-----------------|------------------------------------------|-----------------------------------------|-------------------------------------------|-----------|
| AAS             | -                                        | Cr(III): 1.9 µg/L;<br>Cr(VI): 2.3 µg/L; | -                                         | 1         |
| AAS             | -                                        | Both: 0.01: µg/L                        |                                           | 2         |
| ICP-MS          | -                                        | Both: 0.03: µg/L                        | -                                         | 3         |
| ICP-MS          | -                                        | Both: 0.2: µg/L                         | -                                         | 4         |
| Electrochemical | Au-NP-modified SPE<br>electrode          | Cr (VI): 0.5 µg/L                       | 10 µg/L -5 mL/L                           | 5         |
| Electrochemical | Ti/TiO <sub>2</sub> NT/Au<br>electrode   | Cr(VI): 0.03 µM                         | 0.1-105 µM                                | 6         |
| Colorimetry     | Ag <sub>core</sub> - Au <sub>shell</sub> | Cr(VI): 1×10 <sup>-8</sup> M            | 1×10 <sup>-8</sup> - 8×10 <sup>-6</sup> M | 7         |
| Colorimetry     | Au nanorods                              | Cr(VI): 8.8×10 <sup>-8</sup> M          | 0.1-20 µM                                 | 8         |
| Fluorescence    | PEI-Ag NPs                               | Cr(VI): 0.04 nM                         | 0.1 nM - 3.0 µM                           | 9         |
| Fluorescence    | 11- MUA-AuNCs                            | Cr(III): 26 nM;                         | 25 nM - 10 µM                             | 10        |
| Fluorescence    | Carbon dots                              | Cr(VI): 0.30 µM                         | 0.01-50 µM                                | 11        |
| This method     | F-PEI-capped Au<br>NPs                   | Cr(VI): 0.6 µM                          | 2.8 µM -5.9 µM<br>5.9 µM -29 µM           | This work |

Table S2. Investigation of potential interferences in determination of Cr(VI) at 7.4 µM concentration.

| Tolerance (Interferent/ Cr (VI) molar ratio) | Foreign species                                                                                                                                                                                                                                                                                                                                                              |
|----------------------------------------------|------------------------------------------------------------------------------------------------------------------------------------------------------------------------------------------------------------------------------------------------------------------------------------------------------------------------------------------------------------------------------|
| 100                                          | Na <sup>+</sup> , K <sup>+</sup> , Cl <sup>-</sup> , ClO <sub>3</sub> <sup>-</sup> , Ca <sup>2+</sup> , PO <sub>4</sub> <sup>3-</sup> , HPO <sub>4</sub> <sup>2-</sup> , H <sub>2</sub> PO <sub>4</sub> <sup>-</sup> , HCO <sub>3</sub> <sup>-</sup> , SO <sub>4</sub> <sup>2-</sup> , Mg <sup>2+</sup> , Mn <sup>2+</sup> , NO <sub>3</sub> <sup>-</sup> , Ni <sup>2+</sup> |
| 50                                           | Cr <sup>3+</sup> , Cu <sup>2+</sup> , Br <sup>-</sup> ,                                                                                                                                                                                                                                                                                                                      |
| 25                                           | Pb <sup>2+</sup> , Zn <sup>2+</sup> ,                                                                                                                                                                                                                                                                                                                                        |
| 12.5                                         | Ag <sup>+</sup>                                                                                                                                                                                                                                                                                                                                                              |
| 5                                            | Al <sup>3+</sup>                                                                                                                                                                                                                                                                                                                                                             |
| 2.5                                          | Cd <sup>2+</sup> , Fe <sup>3+</sup>                                                                                                                                                                                                                                                                                                                                          |
| 1                                            | Fe <sup>2+</sup> , I <sup>-</sup>                                                                                                                                                                                                                                                                                                                                            |

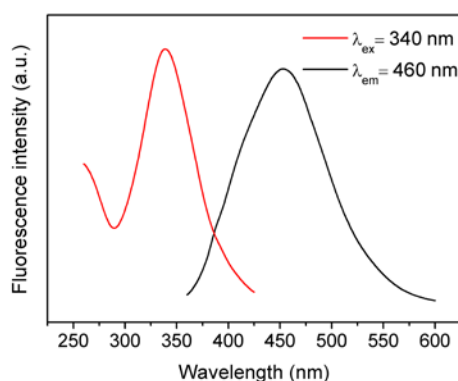

**Figure S1.** The excitation and emission fluorescence spectra of the F-hPEI capped Au NPs.

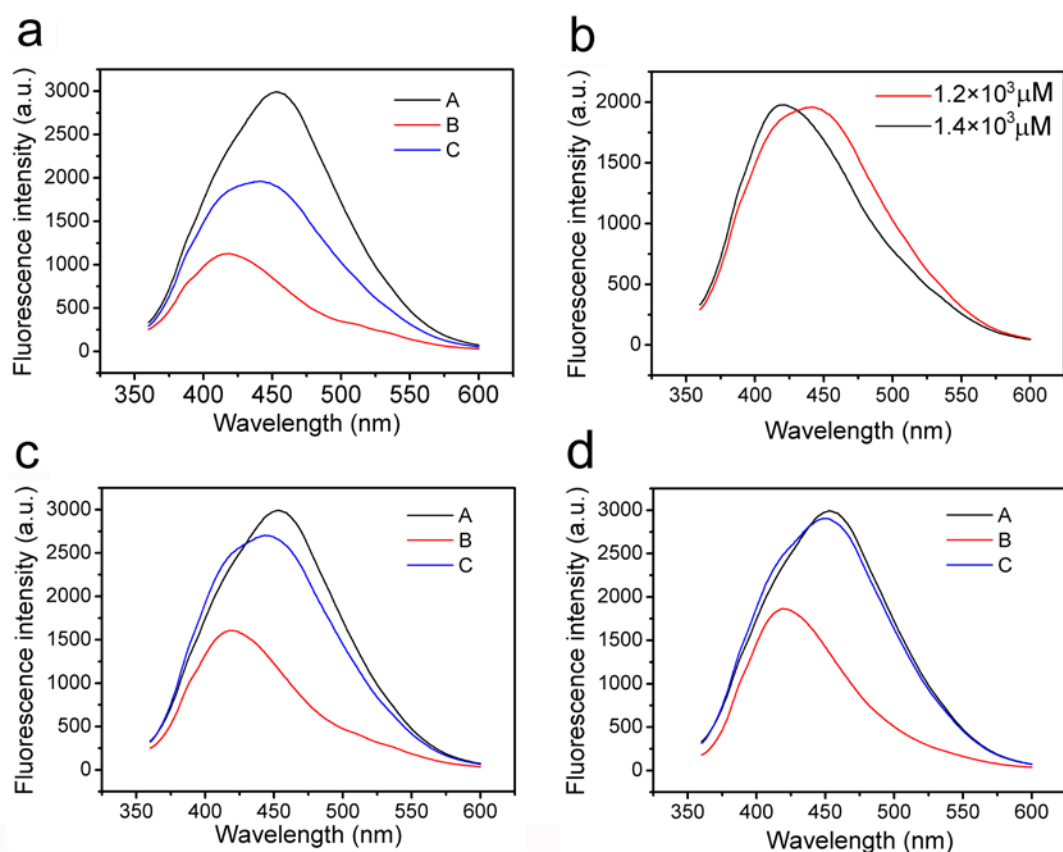

**Figure S2.** (a) (A) (B) represent the fluorescence emission spectra of the F-hPEI-capped Au NPs in the absence and presence of 160  $\mu\text{M}$  Cr(VI), line C is the sensor containing 160  $\mu\text{M}$  Cr(VI) and  $1.2 \times 10^3$   $\mu\text{M}$  Fe(II) ion. (b) The fluorescence emission spectra of the F-hPEI-capped Au NPs containing 160  $\mu\text{M}$  Cr(VI) in the presence of  $1.2 \times 10^3$   $\mu\text{M}$  and  $1.4 \times 10^3$   $\mu\text{M}$  Fe(II) ion. (c) (A) (B) represent the fluorescence emission spectra of the F-hPEI-capped Au NPs in the absence and presence of 80  $\mu\text{M}$

Cr(VI), line C is the sensor containing 80  $\mu\text{M}$  Cr(VI) and  $1.4 \times 10^3 \mu\text{M}$  Fe(II) ion. (d) (A) (B) represent the fluorescence emission spectra of the F-hPEI-capped Au NPs in the absence and presence of 40  $\mu\text{M}$  Cr(VI), line C is the sensor containing 40  $\mu\text{M}$  Cr(VI) and  $1.4 \times 10^3 \mu\text{M}$  Fe(II) ion.

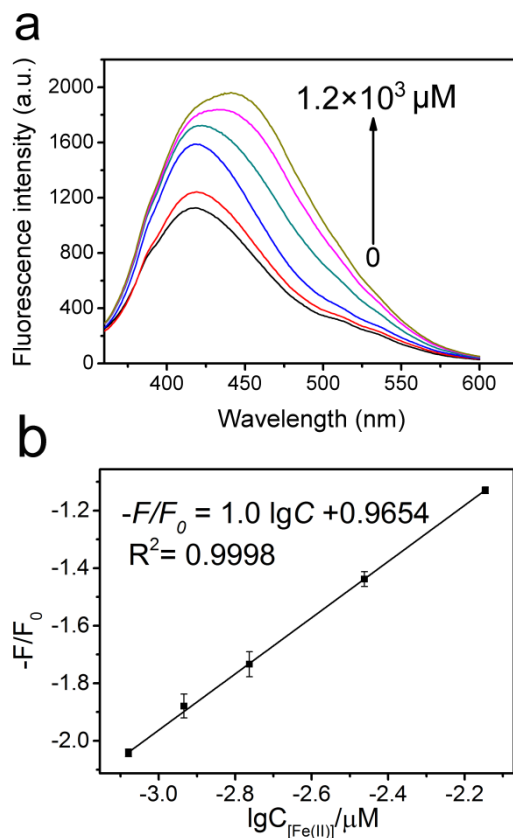

**Figure S3.** (a) Fluorescence spectra of F-hPEI capped Au NPs containing 160  $\mu\text{M}$  Cr (VI) with the addition of different concentrations of Fe(II) ranging from 0  $\mu\text{M}$  to  $1.2 \times 10^3 \mu\text{M}$ . The concentrations corresponding to the spectra from bottom to top are  $1.4 \times 10^2 \mu\text{M}$ ,  $2.9 \times 10^2 \mu\text{M}$ ,  $5.8 \times 10^2 \mu\text{M}$ ,  $8.6 \times 10^2 \mu\text{M}$ ,  $1.2 \times 10^3 \mu\text{M}$ . (b) The corresponding calibration curve for this sensor over the range from  $1.4 \times 10^2 \mu\text{M}$  to  $1.2 \times 10^3 \mu\text{M}$ . The error bars represent the standard deviation of three measurements.

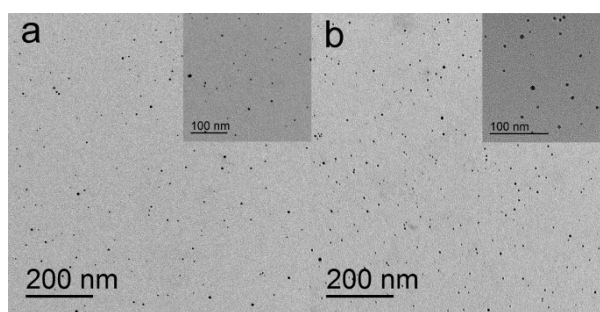

**Figure S4.** The TEM images of F-hPEI capped Au NPs (a) before and (b) after addition of Cr(VI). The insets are the TEM images with high magnification.

## References

- 1 H.F. Maltez, E. Carasek, Chromium speciation and preconcentration using zirconium(IV) and zirconium(IV) phosphate chemically immobilized onto silica gel surface using a flow system and F AAS, *Talanta*. 65 (2005) 537-542.
- 2 A. Sahayam, Speciation of Cr(III) and Cr(VI) in potable waters by using activated neutral alumina as collector and ET-AAS for determination, *Analytical and Bioanalytical Chemistry*. 372 (2002) 840-842.
- 3 H.-J. Wang, X.-M. Du, M. Wang, T.-C. Wang, H. Ou-Yang, B. Wang, M.-T. Zhu, Y. Wang, G. Jia, W.-Y. Feng, Using ion-pair reversed-phase HPLC ICP-MS to simultaneously determine Cr(III) and Cr(VI) in urine of chromate workers, *Talanta*. 81 (2010) 1856-1860.
- 4 Z. Chen, M. Megharaj, R. Naidu, Speciation of chromium in waste water using ion chromatography inductively coupled plasma mass spectrometry, *Talanta*. 72 (2007) 394-400.
- 5 G. Liu, Y.-Y. Lin, H. Wu, Y. Lin, Voltammetric Detection of Cr(VI) with Disposable Screen-Printed Electrode Modified with Gold Nanoparticles, *Environmental Science & Technology*. 41 (2007) 8129-8134.
- 6 W. Jin, G. Wu, A. Chen, Sensitive and selective electrochemical detection of chromium(vi) based

on gold nanoparticle-decorated titania nanotube arrays, *Analyst*. 139 (2014) 235-241.

7 J. Xin, F. Zhang, Y. Gao, Y. Feng, S. Chen, A. Wu, A rapid colorimetric detection method of trace Cr(VI) based on the redox etching of Agcore–Aushell nanoparticles at room temperature, *Talanta*. 101 (2012) 122-127.

8 F.-M. Li, J.-M. Liu, X.-X. Wang, L.-P. Lin, W.-L. Cai, X. Lin, Y.-N. Zeng, Z.-M. Li, S.-Q. Lin, Non-aggregation based label free colorimetric sensor for the detection of Cr(VI) based on selective etching of gold nanorods, *Sensors and Actuators B: Chemical*. 155 (2011) 817-822.

9 J.R. Zhang, A.L. Zeng, H.Q. Luo, N.B. Li, Fluorescent silver nanoclusters for ultrasensitive determination of chromium(VI) in aqueous solution, *Journal of Hazardous Material*. 304 (2016) 66-72.

10 J. Sun, J. Zhang, Y. Jin, 11-Mercaptoundecanoic acid directed one-pot synthesis of water-soluble fluorescent gold nanoclusters and their use as probes for sensitive and selective detection of  $\text{Cr}^{3+}$  and  $\text{Cr}^{6+}$ , *Journal of Materials Chemistry C*. 1 (2013) 138-143.

11 M. Zheng, Z. Xie, D. Qu, D. Li, P. Du, X. Jing, Z. Sun, On–Off–On Fluorescent Carbon Dot Nanosensor for Recognition of Chromium(VI) and Ascorbic Acid Based on the Inner Filter Effect, *ACS Applied Materials & Interfaces*. 5 (2013) 13242-13247.
